# Supplementary material for: Revealing Temozolomide Resistance Mechanisms via Genome-Wide CRISPR Libraries
Source: Cells. 2020 Dec 1;9(12):2573. doi: 10.3390/cells9122573 (PMC7760831; doi:10.3390/cells9122573)
Supplement: Supplementary file 1 [file cells-09-02573-s001.xlsx]

## Sheet: Table S1
Table S1: List of CRISPRko library enriched genes
Gene Name	pos|p-value	pos|FDR	pos|rank	pos|goodsgrna
PMS2	2.27e-07	0.000496	1	5
MSH6	6.8e-07	0.0007429	2	4
MSH2	2.95e-06	0.0021487	3	3
CLCA2	1.74e-05	0.0095052	4	3
CA7	2.29e-05	0.0100078	5	3
MBOAT4	3.19e-05	0.0101139	6	4
TMEM72	3.24e-05	0.0101139	7	4
SSMEM1	6.64e-05	0.0181363	8	2
MLH1	0.00012257	0.0294551	9	6
PTCH2	0.0001348	0.0294551	10	3
PER2	0.00027255	0.0456438	11	3
hsa-mir-1272	0.000273	0.0456438	12	4
ZC2HC1B	0.00028841	0.0456438	13	6
NRXN1	0.00030472	0.0456438	14	6
CBX5	0.00031333	0.0456438	15	6
TRADD	0.00036136	0.0488531	16	4
GALNT7	0.00039987	0.0488531	17	5
PCDHB12	0.00042343	0.0488531	18	6
MBNL2	0.00042479	0.0488531	19	6
OR6C70	0.00048007	0.05245	20	6
ACOT11	0.00052765	0.0526034	21	5
AMMECR1L	0.00053173	0.0526034	22	2
OR5V1	0.00058497	0.0526034	23	6
ZNF224	0.00060015	0.0526034	24	3
KIF5B	0.00063368	0.0526034	25	5
ZP4	0.00063821	0.0526034	26	3
PRRC2B	0.00064999	0.052603	27	5
DPYSL5	0.0006876	0.05366	28	5
PER1	0.00077686	0.055557	29	4
PRDX3	0.00078049	0.055557	30	6
OR8J3	0.00078819	0.055557	31	6
GRIN2B	0.00086567	0.056642	32	6
SESTD1	0.00089558	0.056642	33	6
hsa-mir-6074	0.0009137	0.056642	34	3
PBX3	0.00091506	0.056642	35	6
TGIF2LY	0.00093319	0.056642	36	5
SOHLH2	0.00098122	0.05723	37	6
PRKAR2B	0.00099526	0.05723	38	4
TMEM52	0.001066	0.059726	39	5
SLPI	0.0011348	0.061135	40	3
MINK1	0.0011471	0.061135	41	4
EDARADD	0.0011761	0.061188	42	5
PDSS2	0.0012472	0.06172	43	3
hsa-mir-4511	0.0012753	0.06172	44	3
CALB2	0.0012848	0.06172	45	4
SMARCAD1	0.0012993	0.06172	46	3
PCLO	0.0013487	0.062212	47	5
TTC22	0.0013682	0.062212	48	2
hsa-mir-4532	0.0014081	0.062212	49	2
LYNX1	0.0014429	0.062212	50	4
PLEKHA6	0.0014565	0.062212	51	3
C1orf123	0.0014805	0.062212	52	5
SLAMF7	0.0016033	0.06525	53	5
ZBTB6	0.0016387	0.06525	54	6
CACNA1S	0.0016813	0.06525	55	3
ZMAT2	0.001694	0.06525	56	3
hsa-mir-323b	0.0017021	0.06525	57	4
LOC100129520	0.0018177	0.06848	58	5
HIGD1C	0.0018612	0.068931	59	3
IGFBP1	0.0019042	0.069348	60	3
CYP8B1	0.0019377	0.069411	61	4
RORB	0.0020216	0.069849	62	5
hsa-mir-185	0.002104	0.069849	63	3
LRRC8B	0.0021095	0.069849	64	5
FGF17	0.0021312	0.069849	65	5
KLF11	0.0021337	0.069849	66	5
C16orf74	0.0021448	0.069849	67	3
CDSN	0.002177	0.069849	68	3
ZCCHC5	0.0022658	0.069849	69	5
ABCA13	0.0022667	0.069849	70	6
ZBTB21	0.002298	0.069849	71	3
NIPAL4	0.0023188	0.069849	72	6
RUNX1	0.002341	0.069849	73	4
TP53INP1	0.0023655	0.069849	74	2
C2orf57	0.0025209	0.072222	75	4
OR10H5	0.0025934	0.072222	76	3
FAM19A5	0.0026047	0.072222	77	4
SHE	0.0026079	0.072222	78	5
KRT4	0.0026111	0.072222	79	5
NRXN3	0.002684	0.072345	80	6
TNIP2	0.0027275	0.072345	81	4
SIVA1	0.0027402	0.072345	82	4
OTOP1	0.0027851	0.072345	83	6
ABCC2	0.0028358	0.072345	84	4
ITIH4	0.002878	0.072345	85	4
IL25	0.0028952	0.072345	86	6
PROSC	0.002902	0.072345	87	4
RAB4B	0.0029659	0.072345	88	6
OPN5	0.0029921	0.072345	89	4
GPRC5C	0.0030628	0.072345	90	6
KRT18	0.0030714	0.072345	91	1
MIB1	0.0030769	0.072345	92	6
MACF1	0.0030991	0.072345	93	6
SNX10	0.0031122	0.072345	94	6
MTMR8	0.0031942	0.07347	95	6
RGL4	0.003269	0.074062	96	6
CAMK1	0.0032998	0.074062	97	2
GZMH	0.0033342	0.074062	98	5
F12	0.0033555	0.074062	99	5
PCDHGB3	0.0034258	0.074379	100	2
NFIL3	0.0034557	0.074379	101	4
ZNF223	0.003472	0.074379	102	5
SLCO1C1	0.0035277	0.074839	103	5
IQCF5	0.0036061	0.076917	104	6
EFNB3	0.0036591	0.076917	105	6
ZNF90	0.003887	0.079517	106	3
CELF5	0.0039518	0.079517	107	2
HGFAC	0.0039691	0.079517	108	5
RAI14	0.0039924	0.079517	109	6
WDR31	0.004042	0.079517	110	6
HSF2	0.0040764	0.079517	111	4
CNTNAP4	0.0041367	0.079517	112	4
CD40LG	0.0041412	0.079517	113	6
RSPO1	0.004143	0.079517	114	4
DEFB127	0.0041485	0.079517	115	4
CDK2	0.0041879	0.079517	116	3
TMCO4	0.0042151	0.079517	117	5
HTRA2	0.0044167	0.080764	118	1
POTEH	0.0044172	0.080764	119	1
IGBP1	0.0044484	0.080764	120	5
OPN1LW	0.0044774	0.080764	121	1
EXOSC7	0.0044897	0.080764	122	5
HOXB2	0.0045146	0.080764	123	5
PRKACB	0.0045658	0.080764	124	1
LEFTY1	0.0046079	0.080764	125	6
hsa-mir-371b	0.0046197	0.080764	126	2
SUFU	0.0046986	0.080764	127	4
BSX	0.0047072	0.080764	128	4
GTPBP6_Y	0.0047203	0.080764	129	5
HTR3C	0.0047949	0.080943	130	2
LAMP3	0.0048386	0.080943	131	6
CBLN2	0.0048408	0.080943	132	4
RASL11A	0.0049659	0.081386	133	5
SLC51A	0.0050651	0.081386	134	3
PDE9A	0.005076	0.081386	135	6
ZBTB11	0.005081	0.081386	136	4
SLC9C1	0.0050964	0.081386	137	4
hsa-mir-4646	0.0051005	0.081386	138	3
hsa-mir-4309	0.0051254	0.081386	139	3
ZNF836	0.0052337	0.081873	140	6
DCAF17	0.0052627	0.081873	141	5
USPL1	0.0052921	0.081873	142	4
OMA1	0.0054503	0.081873	143	5
NSFL1C	0.0054634	0.081873	144	6
DTD2	0.0054725	0.081873	145	4
CAMK2A	0.0055269	0.081873	146	3
AGR3	0.0055368	0.081873	147	5
hsa-mir-6775	0.0055414	0.081873	148	4
hsa-mir-5188	0.005574	0.081873	149	2
RASSF8	0.0056003	0.081873	150	4
CSAD	0.0056012	0.081873	151	4
REP15	0.0056623	0.081873	152	5
KRT7	0.0057158	0.081873	153	5
TREML4	0.0057747	0.081873	154	6
C1QTNF2	0.0059496	0.081873	155	3
DNAJB12	0.00597	0.081873	156	1
GRM7	0.0059831	0.081873	157	5
DCAF13	0.0061449	0.081873	158	4
SMPD2	0.0061517	0.081873	159	3
IL17RD	0.0061793	0.081873	160	6
ABCB11	0.0061843	0.081873	161	2
RAVER1	0.0062228	0.081873	162	6
KRTAP9-8	0.0062265	0.081873	163	4
BTRC	0.0062881	0.081873	164	1
MANBAL	0.0063366	0.081873	165	4
PPFIBP2	0.006366	0.081873	166	4
MSL1	0.0063991	0.081873	167	3
hsa-mir-135b	0.0064168	0.081873	168	4
GH1	0.0064267	0.081873	169	5
hsa-mir-3196	0.0064462	0.081873	170	3
RCAN2	0.0065536	0.081873	171	5
CFB	0.0065595	0.082873	172	3
RSPH1	0.0065967	0.082873	173	2
BMP5	0.0067485	0.082873	174	6
ZFP64	0.0067625	0.082873	175	6
TCEB3	0.0068042	0.082873	176	1
BEST1	0.0070104	0.082883	177	2
EXOC2	0.0070203	0.082893	178	5
C7orf34	0.0070239	0.082898	179	6
KRTAP9-3	0.0070398	0.08309	180	2
STYXL1	0.0070783	0.083092	181	6
IKBKE	0.0070915	0.083997	182	6
DISP1	0.0071109	0.084002	183	3
ABCG4	0.0071418	0.084012	184	5
KRTAP21-2	0.0071499	0.08402	185	5
IVL	0.0071816	0.084023	186	6
ADORA3	0.0071862	0.084023	187	4
GABRG2	0.0072034	0.084028	188	3
INIP	0.0072247	0.084028	189	4
KIAA1549L	0.007265	0.084028	190	3
METTL5	0.0072781	0.084031	191	4
hsa-mir-4301	0.0072985	0.08404	192	1
OR51E2	0.007313	0.084147	193	5
PRKCB	0.0073647	0.08427	194	6
ACY3	0.0073769	0.084054	195	4
PAN2	0.0074005	0.084056	196	6
HNRNPA3	0.0074073	0.084057	197	4
HMGXB3	0.0074295	0.08406	198	6
FAM127B	0.0074376	0.08414	199	3
C1orf111	0.0074535	0.08416	200	6
hsa-mir-4656	0.0074752	0.08426	201	4
hsa-mir-6075	0.0074802	0.08434	202	3
CXorf22	0.0075129	0.08436	203	4
C1orf189	0.0075206	0.084498	204	5
DAZL	0.0075631	0.084501	205	4
ISOC2	0.0076492	0.08451	206	3
H2AFY2	0.0076814	0.085244	207	5
PRRX1	0.0077059	0.085804	208	5
GNG12	0.0077435	0.085304	209	2
EIF2AK2	0.0078509	0.085304	210	4
PLA2G2F	0.0079275	0.085304	211	3
PJA2	0.0081141	0.085304	212	6
HYI	0.0081499	0.085304	213	2
ZZZ3	0.0081513	0.085304	214	5
ADRA2C	0.0081871	0.085304	215	6
JMJD1C	0.0082551	0.085304	216	5
PCDHB14	0.0083783	0.085403	217	2
PMS1	0.0084925	0.085403	218	5
SEMA4G	0.0084993	0.085403	219	6
MORN3	0.0085238	0.085403	220	6
GRM6	0.0086107	0.085403	221	5
hsa-mir-370	0.0087952	0.085403	222	3
GABRG1	0.0088301	0.085403	223	1
FOLH1	0.0088396	0.085403	224	5
NAP1L2	0.0088586	0.085403	225	6
PIK3CG	0.008881	0.085403	226	6
KIF12	0.0089094	0.085502	227	2
FAM187B	0.0090448	0.085502	228	4
KRTAP6-3	0.0091046	0.856752	229	5
GABRG1	0.0091155	0.856752	230	4
ZNF846	0.0091785	0.856752	231	5
hsa-mir-484	0.0092302	0.856752	232	4
CBWD3	0.0093203	0.856752	233	2
CCDC12	0.0094023	0.856752	234	6
AAR2	0.0094128	0.856752	235	6
C19orf54	0.0094182	0.856752	236	6
PRSS22	0.0094603	0.856752	237	3
TFDP2	0.009497	0.856752	238	6
SPAST	0.009536	0.856752	239	2
SPATA17	0.0096235	0.856752	240	3
DNAJC10	0.0096352	0.856752	241	4
RAE1	0.0096525	0.856752	242	3
ELMO1	0.009667	0.856752	243	4
SERTAD3	0.0097177	0.856752	244	6
UBE2W	0.0098151	0.856752	245	6
DCLK1	0.0098228	0.856752	246	3
ZNF626	0.0098396	0.856753	247	1
KIAA1217	0.0098636	0.856752	248	4
C12orf39	0.0098709	0.856752	249	4
OXR1	0.0099071	0.856752	250	5
AKT1S1	0.009961	0.856752	251	3

## Sheet: Table S2 
Table S2: List of CRISPRa library enriched genes
Gene Name	pos|p-value	pos|FDR	pos|rank	pos|goodsgrna
MSANTD3	5.74e-05	2.02e-05	1	3
HDAC4	6.66e-05	4.13e-05	2	3
NFE2L2	6.66e-05	4.69e-05	3	2
GDNF	9.66e-05	0.00010001	4	2
UBE2E3	0.00010065	0.0002002	5	3
EXTL3	0.00010669	0.00020037	6	2
USP46	0.0001216	0.00020049	7	3
CERS4	0.00012377	0.00023235	8	3
CHD3	0.00014936	0.00025235	9	3
ABHD17C	0.00015936	0.00026235	10	2
PMPCA	0.00017936	0.00027235	11	3
TRPV4	0.00019174	0.00028235	12	2
TSPAN14	0.00019203	0.00029835	13	2
GNAS	0.00019587	0.00029936	14	3
ABI2	0.00019721	0.00029993	15	3
BOK	0.0002347	0.00030587	16	3
PFKFB3	0.00026398	0.00031721	17	3
TSPAN10	0.00027737	0.0003187	18	3
NDUFAF2	0.00028544	0.000320398	19	3
CORO1B	0.0003027	0.00032337	20	1
MED13L	0.00030398	0.00032544	21	3
SCRIB	0.00031024	0.0003327	22	3
SMIM19	0.0003127	0.00033304	23	3
KCTD1	0.00031429	0.00035041	24	3
SET	0.00031441	0.0003627	25	3
KCNH8	0.00031585	0.00037129	26	3
ASMT	0.00031751	0.00039185	27	3
ZNF821	0.00031866	0.00039866	28	3
MMS19	0.00031937	0.00040537	29	2
HOXA13	0.00031942	0.00044803	30	3
CEBPD	0.00032004	0.0004524	31	2
SAMD5	0.00032993	0.00045974	32	3
TCEA3	0.00033004	0.0004827	33	3
RAB22A	0.00033041	0.00048457	34	3
NEO1	0.00034074	0.00049069	35	3
MAPK9	0.00035019	0.00056822	38	3
USP39	0.00035087	0.00051961	36	3
PCID2	0.000351	0.00053336	37	2
CASP3	0.00038145	0.00057498	39	3
TMEM187	0.00039166	0.00057602	40	3
COPS9	0.00040175	0.00059357	41	3
ASIC1	0.00041192	0.00060552	42	3
HHEX	0.00043201	0.00061205	43	2
CINP	0.00045209	0.00061638	44	3
EPHB2	0.00049215	0.00061868	45	3
ATP5E	0.00058463	0.00062123	46	3
ARL4C	0.00058908	0.00063715	47	3
CGREF1	0.00059352	0.00065826	48	3
RASGRP2	0.00060552	0.00066133	49	3
MTIF3	0.00061205	0.00070085	50	3
LMF1	0.00061638	0.00070085	51	3
TLCD1	0.00061868	0.00070399	52	3
KLHL25	0.00062123	0.00070872	53	3
KDM7A	0.00063715	0.0007421	54	3
CERS1	0.00064433	0.00074665	55	2
PPM1H	0.00064705	0.0007893	56	2
CELF5	0.00065238	0.00083092	57	3
MYH11	0.00065826	0.00083195	58	2
KCMF1	0.00066133	0.00083232	59	2
FAHD2A	0.00067552	0.0008746	60	3
TBCA	0.00068315	0.00087647	61	3
BCAP31	0.00068908	0.00087826	62	2
MGA	0.000689463	0.00091583	63	2
MGMT	0.00070085	0.00091726	64	3
PSPH	0.00070183	0.0009599	65	1
TGFB1I1	0.00070399	0.00099098	66	3
MADCAM1	0.00071373	0.0010026	67	3
ZIC2	0.00071872	0.0010068	68	3
CPEB3	0.0007204	0.0010119	69	2
MSI1	0.00073433	0.0010219	70	2
IGDCC3	0.0007421	0.0010331	71	3
BCL2L11	0.0007481	0.0010406	72	3
FAM35A	0.00075572	0.0010436	73	3
ZCCHC2	0.00075643	0.0010452	74	3
GSTP1	0.00076179	0.0010516	75	1
POLK	0.0007745	0.0010662	76	2
RUFY2	0.0007793	0.0010722	77	3
KCNIP3	0.0007845	0.0010769	78	3
SHB	0.00079665	0.0010878	79	2
FLT4	0.00080093	0.0011222	80	3
CSDC2	0.00081082	0.0011305	81	3
FAM3C	0.00081893	0.0011731	82	3
TSPO	0.0008216	0.0011769	83	2
DPYSL2	0.00082441	0.0011881	84	2
ACSS1	0.00083092	0.001195	85	1
GPR27	0.00084052	0.0012158	86	2
ZFPM1	0.00084191	0.0012465	87	3
MAN1A2	0.0008479	0.0012584	88	2
CSPG4	0.00085043	0.0013011	89	1
SEMA6D	0.00085222	0.0013014	90	3
ADAP1	0.00085391	0.001317	91	3
KLHL26	0.00085922	0.0013437	92	2
LYNX1	0.00086441	0.0013517	93	3
KIAA2026	0.00086602	0.0013863	94	3
SQSTM1	0.0008709	0.0013941	95	3
CCNA1	0.0008746	0.0014008	96	3
LRRC4B	0.00087943	0.0014126	97	1
ERBIN	0.00088323	0.001419	98	3
COMMD5	0.00089043	0.001427	99	2
PRKX	0.00089871	0.001429	100	3
STK3	0.00090316	0.0014605	101	2
PHF24	0.00091096	0.0014716	102	3
BTG1	0.00091726	0.001493	103	2
WIZ	0.00092326	0.001502	104	3
DCAKD	0.00093115	0.0015142	105	3
LGALS7B	0.00093424	0.0015569	106	3
NOS1AP	0.00093915	0.0015649	107	3
TRIM52	0.00094025	0.0015995	108	2
DNAJB6	0.0009459	0.001622	109	2
MYB	0.0009483	0.0016421	110	3
CSRP2	0.0009519	0.0016848	111	2
JDP2	0.0009599	0.0016974	112	2
DVL3	0.0009654	0.0017091	113	2
CELF2	0.0009684	0.0017193	114	2
CISD1	0.0009701	0.0017274	115	2
BMPR1A	0.0009732	0.0017535	116	3
ATP11A	0.00098302	0.0017606	117	3
RGPD5	0.00098898	0.0017697	118	3
MRPL14	0.00099001	0.00177	119	2
PRELID2	0.00099098	0.0018066	120	2
DPYSL5	0.00099293	0.0018071	121	2
FSCN1	0.00099338	0.0018126	122	4
ZNF296	0.00099377	0.0018221	123	2
ATRAID	0.00099421	0.0018553	124	3
ADCY9	0.00099504	0.0019405	125	1
DOCK5	0.00099597	0.001951	126	2
TMEM132D	0.00099637	0.0019831	127	2
PDIK1L	0.00099958	0.0019989	128	3
CELSR1	0.0010026	0.0020018	129	3
P2RX2	0.0010095	0.0020257	130	3
ARL16	0.0010131	0.0020271	131	3
HOMER2	0.0010219	0.0020684	132	2
CCDC65	0.0010231	0.0020753	133	3
SKA2	0.0010244	0.0021024	134	3
PLCE1	0.0010294	0.002111	135	2
KIAA0232	0.0010309	0.0021199	136	3
MIDN	0.0010331	0.0021536	137	3
PTCHD1	0.0011222	0.0021593	138	3
IGSF3	0.001195	0.0021962	139	2
BRD7	0.0012158	0.0022348	140	3
JAK1	0.0012465	0.0022388	141	3
NCBP3	0.0013265	0.0022551	142	3
SCD5	0.0013941	0.0022715	143	3
SOCS2	0.0014395	0.0022784	144	3
VSTM2A	0.0015995	0.0022814	145	3
ORAI2	0.0017831	0.0022839	146	3
APC2	0.0018898	0.002285	147	2
CYTH1	0.0019112	0.0022883	148	3
PSMD6	0.0019515	0.0023039	149	3
PSMG3	0.002021	0.0023196	150	2
RAB32	0.002111	0.002324	151	2
HNRNPLL	0.002192	0.0023353	152	3
ITPR2	0.0022348	0.0023477	153	3
MTA3	0.0022789	0.0023667	154	1
KLF14	0.0023029	0.002374	155	3
CABLES1	0.0023196	0.0023872	156	3
CTR9	0.0023544	0.0024093	157	3
MPP3	0.0024093	0.0024095	158	2
DAZL	0.0025037	0.002439	159	3
GBAS	0.0027075	0.0024519	160	3
MPDU1	0.0027927	0.0024537	161	2
KIF1A	0.0028046	0.0024591	162	3
AXIN1	0.0028353	0.0024716	163	1
TIPARP	0.0029207	0.0024836	164	3
ACTR6	0.0030091	0.0024945	165	3
TLE2	0.003176	0.0024966	166	2
FZD6	0.003199	0.0025037	167	2
PIP4K2C	0.0032027	0.0025371	169	2
VEZF1	0.003205	0.002512	168	2
FAM58A	0.0032097	0.0025563	170	3
TGIF2	0.0032186	0.0025672	171	3
EMID1	0.0032222	0.0025797	172	3
GNAI1	0.0032325	0.0026223	173	2
SCARA3	0.0032612	0.0026228	174	3
WDR5	0.0032738	0.0026289	175	3
SRXN1	0.003294	0.002645	176	3
SYK	0.0033038	0.0026538	177	1
MRPL16	0.0033338	0.0026649	178	3
NKAIN4	0.0034741	0.0026774	179	3
WSB2	0.0034865	0.0027075	180	3
GMPS	0.003525	0.0027406	181	3
GPR137C	0.0035334	0.0027427	182	3
PRR5	0.0035388	0.0027478	183	3
DEK	0.0035407	0.0027501	184	2
UXS1	0.00357677	0.002763	185	2
STK24	0.0036153	0.0027927	186	1
HOXD8	0.0037482	0.0028046	187	3
ACACA	0.0038368	0.0028353	188	3
TUBB6	0.00387427	0.0028396	189	3
FBXO11	0.00396049	0.002855	190	3
CTNNA2	0.0040008	0.0028731	191	3
MYOCD	0.0040462	0.0028757	192	3
HCN2	0.0041049	0.0028779	193	2
FBXO5	0.0041544	0.0028912	194	2
GBX1	0.00420477	0.0029205	195	3
CD82	0.0042746	0.0029207	196	3
NCMAP	0.00430323	0.0029631	197	3
ATAD2B	0.00437427	0.0030056	198	3
GSK3B	0.00440478	0.0030091	199	1
WIPF1	0.00447501	0.0030144	200	3
ENAH	0.00453212	0.0030195	201	3
LMTK2	0.0045763	0.0030462	202	3
NTMEM70	0.0046228	0.0030482	203	2
ERCC1	0.0046717	0.0030649	204	3
CPSF3	0.0047628	0.0030836	205	2
CAMKK1	0.0047931	0.0030903	206	3
IRX5	0.0048645	0.0030908	207	2
B3GALT6	0.0048832	0.0030997	208	3
FAM13C	0.0049153	0.0031334	209	3
RAP1GDS1	0.0049664	0.0031534	210	2
COX4I1	0.0050677	0.003176	211	1
ARRDC2	0.00509563	0.0032027	212	3
BAHCC1	0.0051396	0.003205	213	3
ANKRD10	0.00516072	0.0032186	214	3
GNG4	0.0052055	0.0032222	215	2
ELK3	0.0052597	0.0032325	216	3
ARAP2	0.0052873	0.0032612	217	2
ACTN3	0.0053175	0.0032738	218	2
FAM110C	0.0053823	0.003294	219	3
PGF	0.0054877	0.0033038	220	3
SIAH2	0.0055091	0.0033338	221	3
GSTM4	0.0055219	0.0033889	222	3
RAVER2	0.0055543	0.0034029	223	3
FAM57A	0.0056113	0.0034106	224	3
EXD3	0.0056283	0.0034227	225	3
CTNNB1	0.0056531	0.0034315	226	3
NDUFS8	0.0056988	0.0034741	227	2
GCLM	0.0057322	0.0034865	228	3
FGFRL1	0.0057911	0.003525	229	3
POGK	0.005845	0.0035334	230	1
CD177	0.0058731	0.0035388	231	2
B4GALNT4	0.0059091	0.0035407	232	3
RBM46	0.0059204	0.0035592	233	2
RELT	0.00602322	0.0035637	234	1
FARS2	0.00619631	0.0035694	235	3
LIG4	0.00620056	0.0036018	236	3
MAPK1IP1L	0.0062597	0.0036298	237	3
FAM120B	0.00629334	0.0036444	238	3
FBXO18	0.00630153	0.0036632	239	3
LAMA1	0.00633889	0.0036707	240	2
TRAF3	0.00634029	0.0036765	241	3
GEN1	0.0064106	0.0036869	242	3
IMPDH1	0.0064204	0.0036876	243	3
EXOSC7	0.00649234	0.0037234	244	3
HPCAL1	0.0065227	0.0037295	245	3
MTERF4	0.0065743	0.0037367	246	2
LCLAT1	0.0066315	0.0037666	247	2
ARHGDIA	0.0066792	0.0037721	248	3
NCOR2	0.00673359	0.0038117	249	1
GALNT2	0.00678252	0.0038146	250	2
ZFPM2	0.0068277	0.0038341	251	3
ZBED1	0.0068907	0.0038572	252	3
DCHS1	0.0069097	0.0038798	253	2
MAFB	0.00697631	0.003929	254	3
ABCC3	0.0070298	0.0039353	255	3
TMEM151A	0.00709444	0.0039423	256	3
SLC7A2	0.00713298	0.0039641	257	2
RNPEPL1	0.0071707	0.0039799	258	3
VPS26A	0.0072632	0.0039849	259	2
KCNK2	0.00730234	0.0039856	260	3
RFK	0.0073369	0.0040275	261	1
UBE2E1	0.0073876	0.0040416	262	3
VPS28	0.0074095	0.0040584	263	3
COL3A1	0.0074353	0.00407	264	1
DHFRL1	0.0075423	0.0040807	265	3
CFAP77	0.0076641	0.0041179	266	3
MECOM	0.0077799	0.0041266	267	3
ITGAV	0.0079849	0.0041492	268	2
ZC4H2	0.0081721	0.0041551	269	3
MUM1	0.00828252	0.0041951	270	2
BAI2	0.00830721	0.0041977	271	3
CLIC4	0.0083549	0.0042229	272	3
LDLRAD3	0.00849572	0.0042403	273	3
POLI	0.0085207	0.0042417	274	1
RCC2	0.0085409	0.0042542	275	2
APOBEC3G	0.0085517	0.0042705	276	2
CDK2AP1	0.0086235	0.0042828	277	2
INTS1	0.0086435	0.0043044	278	3
CPNE2	0.008646	0.0043254	279	3
HELZ	0.0087124	0.0043507	280	3
HCCS	0.0087754	0.0044105	281	2
WNT16	0.008853	0.0043456	279	3
SLC6A11	0.0088776	0.0043547	280	3
MOSPD1	0.0089707	0.0044164	284	2
SGO1	0.0089915	0.004453	285	2
IFNK	0.0090612	0.0044601	286	3
NEBL	0.0090662	0.0044956	287	3
PLEKHH2	0.0090863	0.0045381	288	2
SCT	0.0091935	0.0045535	289	2
PBX3	0.0092357	0.0046395	290	3
FBXL4	0.0092978	0.0046658	291	3
ZBTB39	0.0093078	0.0046704	292	3
GTF3C1	0.0093179	0.0046979	293	3
SOHLH2	0.0093358	0.0047083	294	2
SYNGR2	0.0093842	0.0047219	295	2
HMOX1	0.0094109	0.0047508	296	3
TP53INP2	0.0094693	0.004763	297	2
CPEB1	0.0097518	0.0047934	298	2
CLIP1	0.0098545	0.0047943	299	2
ARHGDIG	0.0098557	0.0048053	300	3
LSM5	0.0099175	0.0048162	301	2
CTTNBP2	0.0099246	0.0048284	302	1
KLRG2	0.0099371	0.0048359	303	2
BAMBI	0.0099534	0.0048527	304	3
PTPRJ	0.0099663	0.0048785	305	3
FBXL13	0.0099759	0.0048844	306	3
FGFRL1	0.0099794	0.0048979	307	2
ADAMTS19	0.0099863	0.0049044	308	2
